# Supplementary material for: Spatially encoded 2D and 3D diffusion-ordered NMR spectroscopy
Source: Royal Society of Chemistry journal article supplement (doi:10.1039/c6cc09028a), 2016-11-29
Supplement: c6cc09028a1.pdf [file c6cc09028a1.pdf]

**Supplementary information for**  
***Spatially encoded 2D and 3D diffusion-ordered spectroscopy***

Ludmilla Guduff, Carine van Heijenoort, and Jean-Nicolas Dumez\*

*Institut de Chimie de Substances Naturelles,  
CNRS UPR2301, Univ. Paris Sud, Université Paris-Saclay,  
Avenue de la Terrasse, 91190 Gif-sur-Yvette, France*

Ilya Kuprov

*School of Chemistry, University of Southampton,  
University Road, Southampton SO17 1BJ, United Kingdom.  
(Dated: November 11, 2016)*

## CONTENTS

|                                       |    |
|---------------------------------------|----|
| A. Discussion of models for SPEN DOSY | 3  |
| 1. Introduction                       | 3  |
| 2. General expression                 | 3  |
| 3. Analytical calculation             | 4  |
| 4. Numerical calculation              | 4  |
| 5. Proposed model                     | 5  |
| B. Materials and methods              | 5  |
| 1. Sample preparation                 | 5  |
| 2. NMR spectroscopy                   | 5  |
| 3. Data processing                    | 6  |
| 4. Numerical simulation               | 6  |
| C. Supplementary figures              | 8  |
| D. Pulse programs for SPEN DOSY       | 11 |
| 1. SPEN 2D DOSY                       | 11 |
| 2. SPEN COSY DOSY                     | 14 |
| References                            | 19 |

## A. Discussion of models for SPEN DOSY

### 1. Introduction

Classic DOSY data processing relies on a model of the form:

$$S_i = S_0 \exp(-DK_i^2 \Delta'), \quad (1)$$

where  $S_i$  is the attenuated intensity for the  $i$ th gradient increment,  $\Delta'$  is an effective diffusion delay that accounts for the finite width of the gradient pulses, and  $K_i$  is the area of the diffusion-encoding gradient. For example, for the standard spin-echo experiment, using square gradients:

$$K_i = \gamma G_i \delta, \quad (2)$$

and

$$\Delta' = \Delta - \frac{\delta}{3}. \quad (3)$$

where  $G_i$  is the  $i$ th gradient intensity and  $\delta$  is the duration of the gradient pulses.

For SPEN DOSY experiments, a convenient approach to fit the data would rely on a model of a form analogous to Eq. 1:

$$S(z) = S_0 \exp(-D (K_{\text{eff}}(z))^2 \Delta'), \quad (4)$$

where  $K(z)$  is the effective gradient area at position  $z$ . Several equations of this form have been described in the literature.<sup>1-3</sup>

In this appendix, we will give a brief outline of the derivation of existing models and introduce an alternative model.

### 2. General expression

The attenuation caused by translational diffusion during a series of spin dynamics events is:

$$S(z, t) = S_0 \exp \left( -D \int_0^t (K(z, t'))^2 dt' \right), \quad (5)$$

where

$$K(z, t) = \frac{\partial \phi(z, t)}{\partial z} \quad (6)$$

is the first spatial derivative of the spins' phase. For the SPEN DOSY encoding block described in Fig. 1a of the main text, this may be rewritten as:

$$S(z, t) = S_0 \exp \left( - (b_{\text{chirp1}} + b_{\text{delay}} + b_{\text{chirp2}}) D \right), \quad (7)$$

where

$$b_{\text{chirp1}} = \int_0^\tau (K_{\text{chirp1}}(z, t'))^2 dt', \quad (8)$$

$$b_{\text{delay}} = (\Delta - \tau) (K_{\text{chirp1}}(z, \tau))^2, \quad (9)$$

$$b_{\text{chirp2}} = \int_0^\tau (K_{\text{chirp2}}(z, t'))^2 dt'. \quad (10)$$

The term  $b_{\text{chirp1}}$  and  $b_{\text{chirp2}}$  correspond to the attenuation during the first and second chirp and gradient pair, respectively; the term  $b_{\text{delay}}$  corresponds to attenuation during the diffusion delay;  $\tau = T_p + T_e$  is the duration of the chirp and gradient pair.

### 3. Analytical calculation

A common approximation to describe frequency swept pulses consists of assuming that spins flip instantaneously at the time  $t_\Omega$  when the frequency of the pulse matches that of the spins.<sup>2,3</sup> This description may be adapted to the present case, in which an additional gradient is used after the chirp. Under this approximation:

$$K_{\text{chirp1}}(z, t) = \gamma G_e t \quad \text{when} \quad 0 < t < t_\Omega, \quad (11)$$

$$K_{\text{chirp1}}(z, t) = \gamma G_e (t - 2t_\Omega) \quad \text{when} \quad t_\Omega < t < \tau, \quad (12)$$

$$K_{\text{chirp2}}(z, t) = \gamma G_e (t + \tau - 2t_\Omega) \quad \text{when} \quad 0 < t < t_\Omega, \quad (13)$$

$$K_{\text{chirp2}}(z, t) = \gamma G_e (t - \tau) \quad \text{when} \quad t_\Omega < t < \tau. \quad (14)$$

For a pulse that sweeps linearly over a region of length  $L$  in a duration  $T_e$ , spins flip at a time:

$$t_\Omega = T_e \left( \frac{z}{L} + \frac{1}{2} \right). \quad (15)$$

Additional offset terms may also be included in Eq. 15. Combing Eqs 7 to 15, an analytical expression is obtained for  $S(z)$ :

$$S(z) = S_0 \exp \left( -D (\gamma G_e T_e)^2 \left( \frac{(T_e + T_p)^3}{6T_e^2} + \left( \frac{2z}{L} - \frac{T_p}{T_e} \right)^2 \left( \Delta - \frac{T_e + T_p}{2} \right) \right) \right) \quad (16)$$

which may be identified with Eq. 5 with the correspondance:

$$K_{\text{eff}}^{(a)} = -\gamma G_e T_e \left( \frac{2z}{L} - \frac{T_p}{T_e} \right), \quad (17)$$

and

$$\Delta'^{(a)} = \Delta - \frac{T_e + T_p}{2}. \quad (18)$$

The expression for  $K_{\text{eff}}^{(a)}$  is also the effective gradient area for the chirp and gradient pair,<sup>4</sup> given in Eq. 2 of the main text.

### 4. Numerical calculation

Alternatively, the effective gradient area imparted by a chirp pulse can be calculated exactly as:<sup>1</sup>

$$K_{\text{eff}}^{(n)} = \int_0^{T_e} \frac{d}{dz} \left( \sqrt{(\Omega_0 + \gamma G_e z - \omega_{rf}(t))^2 + \omega_1(t)^2} \right) dt + \gamma G_e T_p \quad (19)$$

where  $\omega_{rf}$  and  $\omega_1$  are, respectively, the frequency and the amplitude of the chirp pulse as a function of time. Equation 19 may be evaluated numerically, as in the work of Keeler and co-workers. The duration of the chirp and gradient pair is assumed to be negligible. As a result,  $b_{\text{chirp1}} \simeq 0$ ,  $b_{\text{chirp2}} \simeq 0$  and

$$\Delta'^{(n)} = \Delta. \quad (20)$$

## 5. Proposed model

In the present work, we use a model that combines the exact calculation of the phase imparted by the chirp with an effective diffusion time. The former avoids the limitation of the “instantaneous-flip” approximation, and the latter captures the effect of the finite duration of the chirp and gradient pair. As a result:

$$K_{\text{eff}} = K_{\text{eff}}^{(n)} \quad (21)$$

and

$$\Delta' = \Delta - \frac{T_e + T_p}{2}. \quad (22)$$

The resulting model makes it possible to reduce systematic errors, as validated with numerical simulations (see Fig. 1c of the main text).

## B. Materials and methods

### 1. Sample preparation

The mixture used to carry out nD SPEN DOSY experiments is composed of L-valine (7.2 mg), methanol (2.4  $\mu\text{L}$ ), ethanol (3.4  $\mu\text{L}$ ) and n-propanol (4.5  $\mu\text{L}$ ) solubilized in 590  $\mu\text{L}$  of  $\text{D}_2\text{O}$ . The solution was shaken until complete dissolution of valine and filtered to remove any solid particles. The concentration is near 100 mM for each compound. The sample was then introduced in a standard 5 mm tube.

The same mixture was prepared for conventional nD DOSY, using instead a 5 mm Shigemitsu tube with a sample length of 10 mm.

A sample of 600  $\mu\text{L}$   $\text{D}_2\text{O}$  was prepared in a standard 5 mm tube, to record a reference profile used for lineshape corrections with the residual  $\text{H}_2\text{O}$  signal.

### 2. NMR spectroscopy

All the experiments were carried out on a Bruker spectrometer operating at a Larmor frequency of 600.13 MHz, equipped with a triple-axis gradient probe. The temperature was set at a nominal value of 298 K and the diffusion time was 100 ms for all the DOSY experiments.

Conventional 2D spectra were recorded using a stimulated echo sequence with bipolar gradient pulses (stebpgp1s Bruker sequence with additional lock stabilisation gradients). Conventional 3D spectra were recorded using diffusion measurement using a stimulated echo sequence (ledbpgpco2s3d Bruker sequence with additional lock stabilisation). The diffusion-encoding gradient values consisted of a linear ramp ranging from 0.0065 T/m to 0.455 T/m. The duration of the gradient pulses was 800  $\mu\text{s}$ . The 2D spectra were acquired with 16384 points in the direct dimension, a spectral width of 6000 Hz, a relaxation delay of 2.5 s and 16 gradient steps, resulting in a total experiment duration of 17 min. These parameters were transposed to the 3D experiment. The number of points was set to 128 in the additional indirect dimension, with a spectral width of 2600 Hz, resulting in total experiment duration of 14 h.

For the SPEN experiments, the diffusion-encoding parameters were chosen so that the minimum and maximum values of the gradient area would match those used in conventional DOSY, with a pulse sweeping a region of 10 mm. The resulting parameters are a chirp bandwidth of 110 000 Hz, an encoding gradient of 0.2535 T/m, a 1.5 ms duration for the chirp, and a 1.6 ms duration for the post-chirp gradient. Acquisition parameters were a 0.195 T/m acquisition gradient strength with 256 gradients loops of 256 points each and a 0.75  $\mu$ s dwell time. This results in a spectral width of 2600 Hz. The gradient strength for coherence selection around the first chirp pulse were  $a = 0.065$  T/m,  $a + c = 0.1495$  T/m with a duration of 800  $\mu$ s. The gradient strength for coherence selection around the second chirp pulse were  $b = 0.1300$  T/m,  $b + c = 0.2145$  T/m with a duration of 800  $\mu$ s. The gradient strength for the spoiler during longitudinal storage was  $f = -0.3716$  T/m and its counterpart  $g_1 = -f$  with a duration of 800  $\mu$ s. Balancing pulses for lock signal retention were  $g_2 = (2a + c)/2$  and  $g_3 = (2b + c)/2$  with a duration of 1600  $\mu$ s. The prephasing gradient,  $g_4$ , was set to 0.0975 T/m.

The 2D experiment was recorded in a single scan of less than 250 ms. The SPEN DOSY COSY was recorded with 128 increments in the indirect dimensions and 8 dummy scans, with an inter-scan delay of 5 s, resulting in a total experimental time of 11 min.

The reference profile was acquired with a double-spin echo imaging pulse sequence using the same chirp parameters as for the SPEN DOSY experiments. The acquisition parameters were a 0.195 T/m acquisition gradient strength with 256 points and a 0.75  $\mu$ s dwell time, which corresponds to a single echo of the SPEN DOSY acquisition.

### 3. Data processing

The data from conventional DOSY experiments were processed with the DOSY Toolbox, which is an open source programme for PFG diffusion NMR data processing.<sup>5</sup> For the DOSY-COSY and all SPEN experiments, the data were processed in MATLAB (The Mathworks, Natick, U.S.A.) using home-written routines, adapted in part from the DOSY Toolbox. In short, the nD SPEN data was read from Bruker files, then sorted and reshaped in order to get a nD matrix. The data was multiplied by a sine function and zero-filled in the  $t_1$  or  $(t_1, t_3)$  dimension(s). Only the odd echoes were retained, and Fourier transformation was performed along all dimensions. The spectra were processed in magnitude mode.

For SPEN 2D DOSY, peak maxima were selected manually and the spatial profile for each peak was obtained as a row of the  $(z, \omega)$  data set. For the 3D data set, regions were selected manually in the  $(\omega_1, \omega_3)$  plane and the spatial profile was obtained by integration over each region. The spatial profiles were fitted with a Stejskal-Tanner equation for all resonances. The DOSY representation was obtained Gaussian lineshapes with maxima corresponding to the calculated  $D$  value and linewidths set by the error of the fit.

### 4. Numerical simulation

Numerical simulations were carried out with MATLAB, using the SPINACH library<sup>6</sup> (version 1.8.3420). The SPEN DOSY experiment was simulated with encoding parameters that mimic the ones used experimentally. Specifically, encoding gradients of 0.2535 T/m were applied combined with a chirp pulse of 110 kHz bandwidth, with a duration of 1.5 ms. The post-chirp gradient had a duration of 1.6 ms. The acquisition was performed with a gradient

amplitude of 0.52 T/m, a duration of 192  $\mu$ s and 256 points. The spectrometer gradient-based coherence selection was replaced by analytical coherence selection that proceeds by simply zeroing the unwanted elements of the state vector. The sample was described with 3000 points over a length of 0.015 m. For the diffusion operator, periodic boundary conditions were used, with 7-point central finite difference operators. The simulated 2D FID was Fourier transformed and the resulting spatial profile fitted with a Stejskal-Tanner equation. Full numerical implementation details will be published in a more specialised journal in due course; the corresponding Spinach example files will be included in the next public release of the code.

### C. Supplementary figures

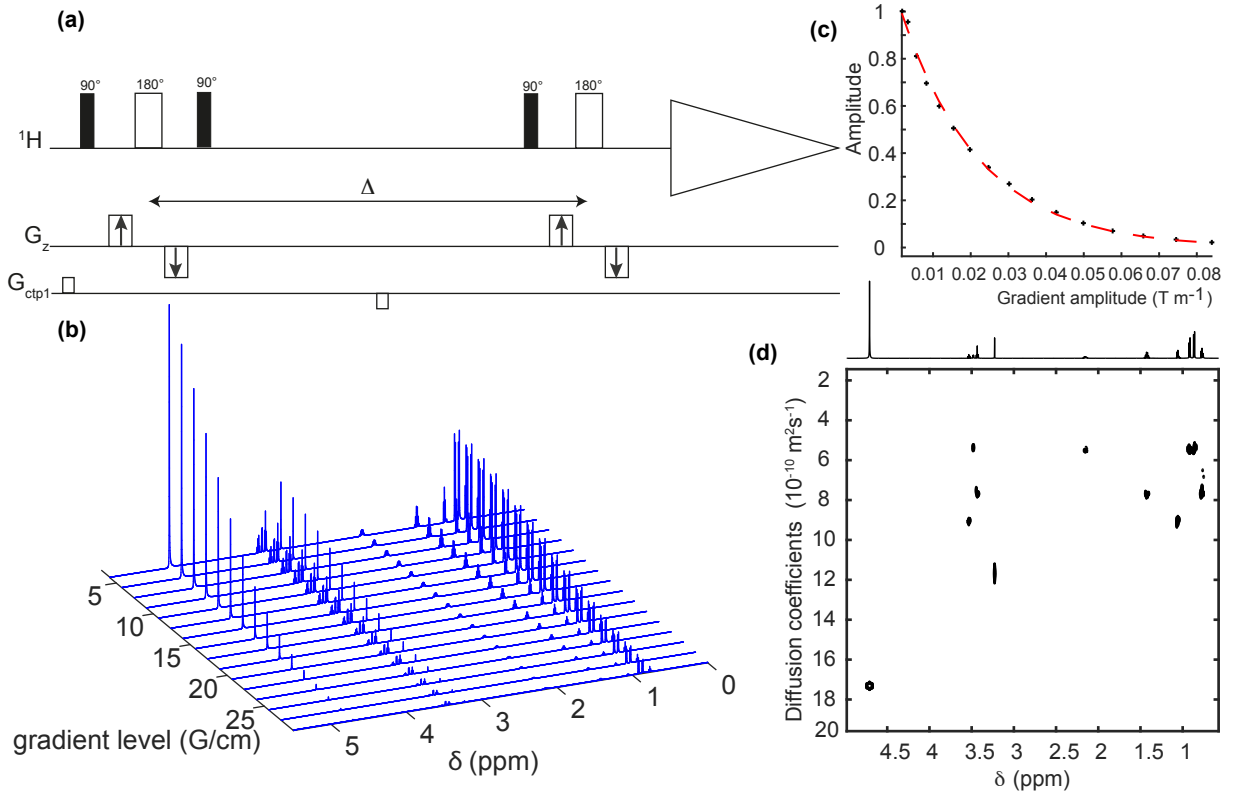

FIG. 1. 2D DOSY. (a) Pulse sequence for 2D DOSY with Z-filter and its compensating counterpart. (b) Series of decaying spectra obtained with the 2D DOSY experiment on a mixture of 3 alcohols (methanol, ethanol, propanol) and an amino-acid (L-valine) in  $\text{D}_2\text{O}$ . (c) Diffusion decay curve obtained from the data set shown in (b), for the methanol  $\text{CH}_3$  resonances at 3.2 ppm. The best fit-curve for the modified Stejskal-Tanner equation is shown in red with  $D = 11.7 \text{ m}^2 \cdot \text{s}^{-1}$  (d) 2D DOSY display obtained from the data set shown in (b).

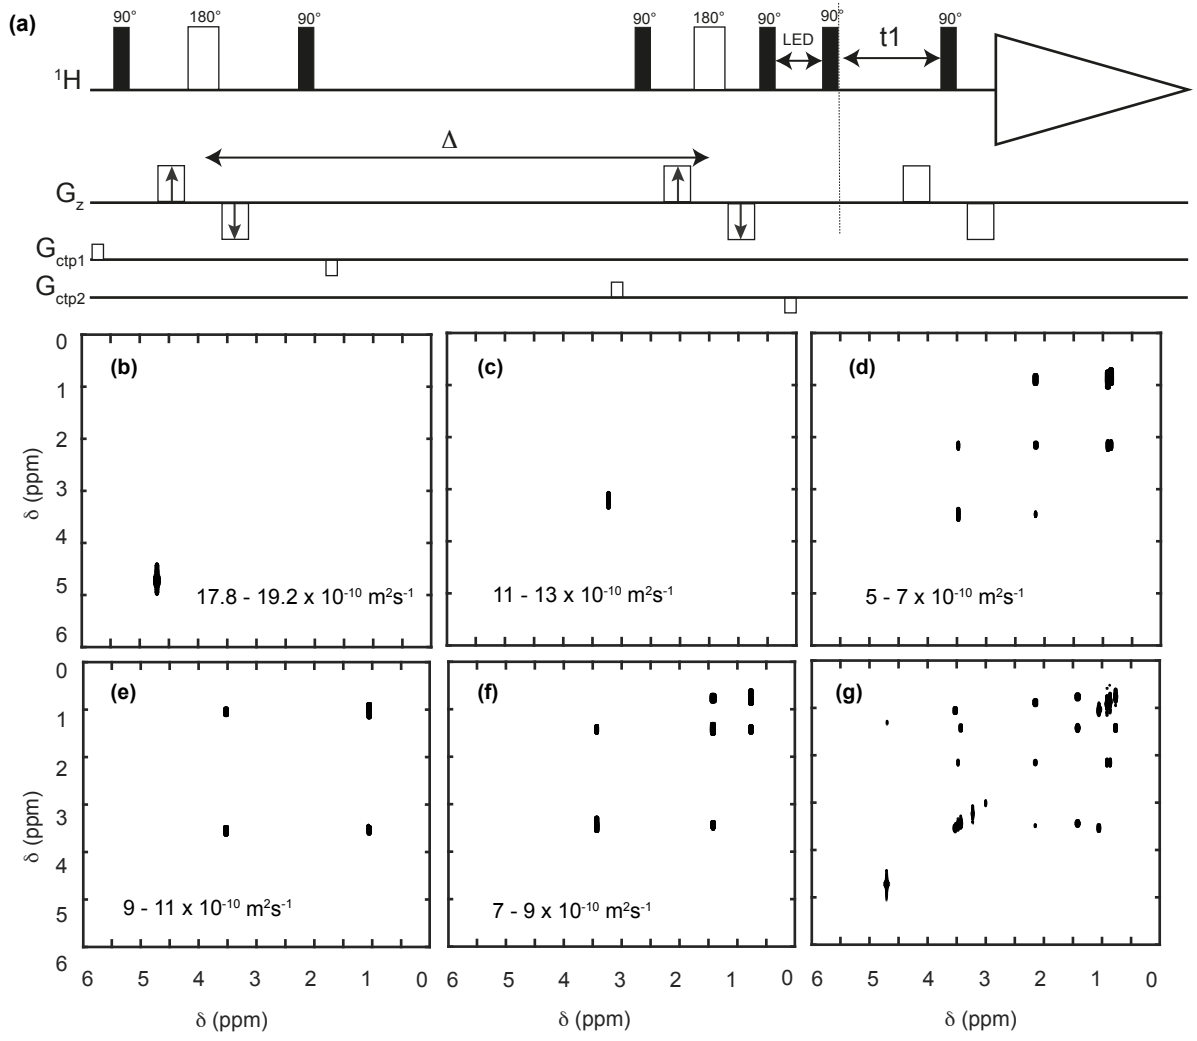

FIG. 2. 3D DOSY. (a) Pulse sequence for DOSY COSY. (b-f) COSY-type spectra obtained as slabs of the 3D ( $D$ ,  $\delta_{\text{direct}}$ ,  $\delta_{\text{indirect}}$ ) dataset resulting from DOSY processing. The selected range in  $D$  is shown in each panel. The COSY spectrum with the lowest diffusion gradient area is shown in (g).

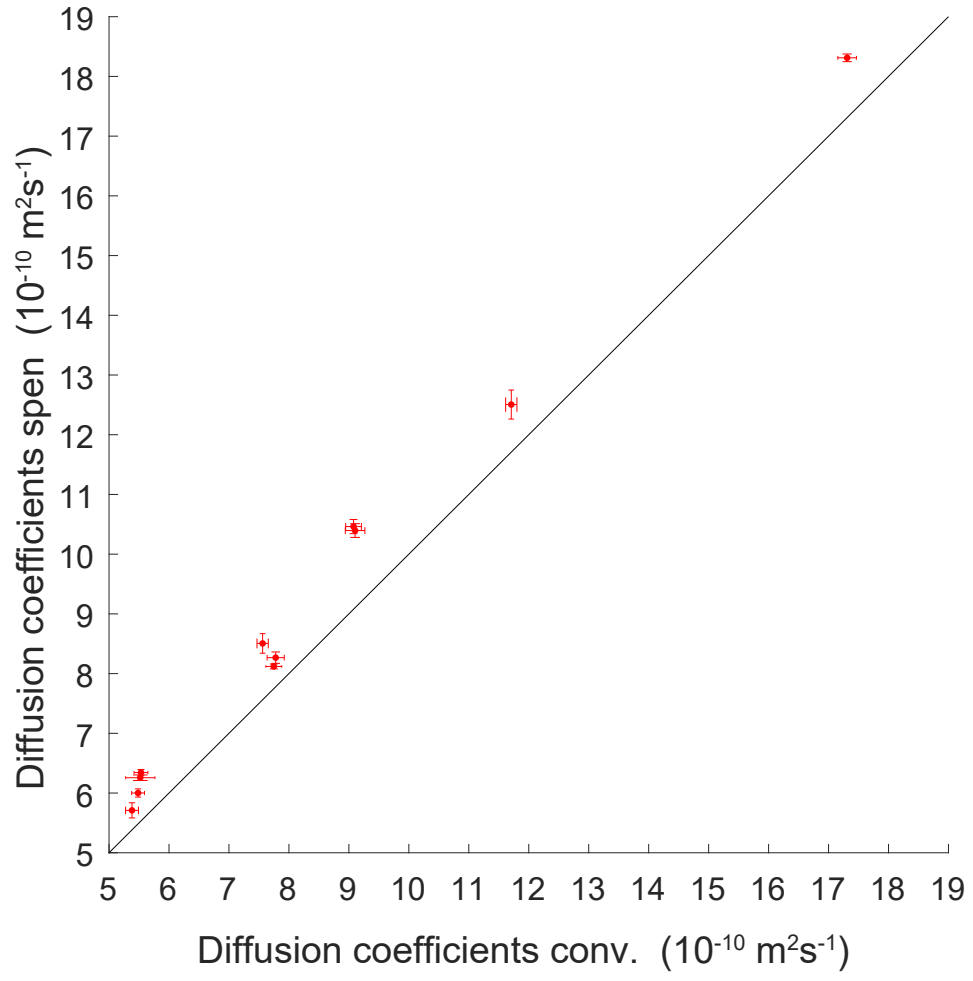

FIG. 3. Comparison of the diffusion coefficients obtained with conventional and SPEN 2D DOSY. The diagonal line is shown as a guide to the eye.

## D. Pulse programs for SPEN DOSY

### 1. *SPEN 2D DOSY*

```
; Ludmilla Guduff, Carine van Heijenoort and Jean-Nicolas Dumez
; ICSN-CNRS
; spendosy
; 2D sequence
; spatially encoded 2D diffusion-ordered spectroscopy

;$CLASS=HighRes
;$DIM=2D
;$TYPE=
;$SUBTYPE=
;$COMMENT=

#include <Avance.incl>
#include <Grad.incl>
#include <De.incl>
#include <Delay.incl>

"d20=(td*dw/(2*13))-d6"
"d12=p11"
"DELTA1=d30-p11-2*d2-d11-2*p20-2*d16-2*p1-2*p21-2*d16-p22-d16-2*d11-2*d12-4*d2"
"p21=p20*2"

1 ze
  20u st0
  30m zd

2 30m
  d1
  50u UNBLKGRAD
  20u p11:f1

  p22:gp24*-1
  d16

;excitation
  p1 ph1
  d5

;spatial encoding
  p20:gp20
  d16
  d2 gron0
```

```

p11:sp1:f1 ph2
d11
d2 groff
p20:gp21
d16

;stimulated echo
d5 p11:f1
p1 ph1
p21:gp26*-1
d16
d2 gron1
d12
d11
d2 groff
p22:gp24
d16
DELTA1
d2 gron1
d12
d11
d2 groff
p21:gp27*-1
d16
p1 ph1

;decoding period
p20:gp22
d16
d2 gron0
p11:sp1:f1 ph2
d11
d2 groff
p20:gp23
d16
p25:gp25
d16

;acquisition
ACQ_START(ph30,ph31)
1u DWELL_GEN:f1
3 d20 gron2
d6 groff
d20 gron3
d6 groff
lo to 3 times l3
rcyc=2

```

```

30m mc #0 to 2 F1QF(id2)
100u BLKGRAD
exit

```

```

;phase cycling
ph1=0
ph2=0
ph3=0
ph29=0
ph30=0
ph31=0

```

```

;p11 : f1 channel - power level for pulse (default)
;sp1: shaped pulse power level for selective detection
;p1 : f1 channel - 90 degree high power pulse
;p11: duration of the encoding chirp
;p20: crusher gradient
;p21: compensation gradient (2 x p20)
;p22: spoiler gradient
;p25: prephasing gradient
;spnam1 : shaped pulse for spatial encoding
;d1: relaxation delay; 1-5 * T1
;d2: ramping period for gradient pulse (25us)
;d5: 5us
;d11: post-chirp gradient
;d16: gradient recovery delay (200us)
;d30: diffusion time (big DELTA)
;d6: gradient ramp off during acquisition
;d20 + d6 : acquisition gradient duration
;GPZ0 : strength for encoding gradient [0-100]
;GPZ1 : compensation gradient GPZ1 = -GPZ0
;GPZ2 : strength for acquisition gradient [0-100]
;GPZ3 : strength for reversed acquisition gradient GPZ3 = -GPZ2
;GPZ20, GPZ21, GPZ22 and GPZ23: crusher gradients
;GPZ24: spoiler gradient
;GPZ25: prephasing gradient
;GPZ26 and GPZ27: compensation gradient: GPZ26 = (GPZ20+GPZ21)/2 GPZ27=(GPZ22+GPZ23)/2
;GPNAM20=GPNAM21=GPNAM22=GPNAM23=GPNAM24=GPNAM26=GPNAM27=SINE.100
;GPNAM25=RECT.1
;NS: 1
;l3=number of loops for acquisition
;IMPORTANT: set d20 + d6 = DW x TD(f3)/(2xL3)

```

## 2. SPEN COSY DOSY

```
; Ludmilla Guduff, Carine van Heijenoort and Jean-Nicolas Dumez
; ICSN-CNRS
; spencosydosy
; 3D sequence
; spatially encoded 3D diffusion-ordered spectroscopy

;$CLASS=HighRes
;$DIM=2D
;$TYPE=
;$SUBTYPE=
;$COMMENT=

#include <Avance.incl>
#include <Grad.incl>
#include <De.incl>
#include <Delay.incl>

"d20=(td*dw/(2*13))-d6"
"d12=p11"
"DELTA1=d30-p11-2*d2-d11-2*p20-2*d16-2*p1-2*p21-2*d16-p22-d16-2*d11-2*d12-4*d2"
"p21=p20*2"
"d0=3u"
"in0=inf1"

aqseq 321

1 ze
  20u st0
  30m zd

;;;;;;;;;;;;; Beginning of dummy scans ;;;;;;;;;;;;;;

21 30m
1u reset:f1

  d1
  50u UNBLKGRAD
  20u p11:f1

  p22:gp24*-1
  d16

;excitation
  p1 ph1
```

```

d5

;spatial encoding
p20:gp20
d16
d2 gron0
p11:sp1:f1 ph2
d11
d2 groff
p20:gp21
d16

;stimulated echo
d5 p11:f1
p1 ph1
p21:gp26*-1
d16
d2 gron1
d12
d11
d2 groff
p22:gp24
d16
DELTA1
d2 gron1
d12
d11
d2 groff
p21:gp27*-1
d16
p1 ph4

;decoding period
p20:gp22
d16
d2 gron0
p11:sp1:f1 ph2
d11
d2 groff
p20:gp23
d16

;cosy encoding block
d5 p11:f1
d0
p28:gp28
d16

```

```

p0 ph2
d13
p28:gp28*-1
d16
p25:gp25
d16

;acquisition
31 d20 gron2
d6 groff
d20 gron3
d6 groff
lo to 31 times l3
100u BLKGRAD
3m
30m
lo to 21 times l4

;;;;;;;;;;;;;;;;;;;;;;;;; End of dummy scans ;;;;;;;;;;;;;;;;;;;;;;;;;;

2 30m
1u reset:f1
d1
50u UNBLKGRAD
20u pl1:f1

p22:gp24*-1
d16

;excitation
p1 ph1
d5

;spatial encoding
p20:gp20
d16
d2 gron0
p11:sp1:f1 ph2
d11
d2 groff
p20:gp21
d16

;stimulated echo
d5 pl1:f1

```

```

p1 ph1
p21:gp26*-1
d16
d2 gron1
d12
d11
d2 groff
p22:gp24
d16
DELTA1
d2 gron1
d12
d11
d2 groff
p21:gp27*-1
d16
p1 ph4

;decoding period
p20:gp22
d16
d2 gron0
p11:sp1:f1 ph2
d11
d2 groff
p20:gp23
d16

;cosy encoding block
d5 p11:f1
d0
p28:gp28
d16
p0 ph2
d13
p28:gp28*-1
d16
p25:gp25
d16

;acquisition
ACQ_START(ph30,ph31)
1u DWELL_GEN:f1
3 d20 gron2
d6 groff
d20 gron3
d6 groff

```

```

    lo to 3 times l3
    100u BLKGRAD
    rcyc=2
    30m mc #0 to 2
    F1QF(id0)
    F2QF(id2)
    d17
exit

```

```

;phase cycling
ph1=0
ph2=0
ph3=0
ph4=0
ph29=0
ph30=0
ph31=0

```

```

;p11 : f1 channel - power level for pulse (default)
;sp1: shaped pulse power level for selective detection
;p1 : f1 channel - 90 degree high power pulse
;p0: mixing pulse
;p11: duration of the encoding chirp
;p20: crusher gradient
;p21: compensation gradient (2 x p20)
;p22: spoiler gradient
;p25: prephasing gradient
;p28: coherence selection gradient for mixing
;spnam1 : shaped pulse for spatial encoding
;d1: relaxation delay; 1-5 * T1
;d2: ramping period for gradient pulse (25us)
;d5: 5us
;d11: post-chirp gradient
;d16: gradient recovery delay (200us)
;d30: diffusion time (big DELTA)
;d6: gradient ramp off during acquisition
;d20 + d6 : acquisition gradient duration
;GPZ0 : strength for encoding gradient [0-100]
;GPZ1 : compensation gradient GPZ1 = -GPZ0
;GPZ2 : strength for acquisition gradient [0-100]
;GPZ3 : strength for reversed acquisition gradient GPZ3 = -GPZ2
;GPZ20, GPZ21, GPZ22 and GPZ23: crusher gradients
;GPZ24: spoiler gradient
;GPZ25: prephasing gradient
;GPZ26 and GPZ27: compensation gradient: GPZ26 = (GPZ20+GPZ21)/2 GPZ27=(GPZ22+GPZ23)/2
;GPZ28: coherence selection gradient for mixing

```

```
;GPNAM20=GPNAM21=GPNAM22=GPNAM22=GPNAM24=GPNAM26=GPNAM27=GPNAM28=SINE.100
;GPNAM25=RECT.1
;NS: 1
;l3=number of loops for acquisition
;l4=number of dummy scans (DS does not work)
;IMPORTANT: set d20 + d6 = DW x TD(f3)/(2xL3)
```

---

\* jeannicolas.dumez@cnrs.fr

- <sup>1</sup> M. J. Thrippleton, N. M. Loening, and J. Keeler, *Magnetic Resonance in Chemistry* **41**, 441 (2003).
- <sup>2</sup> J. Valette, F. Lethimonnier, and V. Lebon, *Journal of Magnetic Resonance* **205**, 255 (2010).
- <sup>3</sup> Y. Shrot and L. Frydman, *Journal of Magnetic Resonance* **195**, 226 (2008).
- <sup>4</sup> A. Tal and L. Frydman, *Progress in Nuclear Magnetic Resonance Spectroscopy* **57**, 241 (2010).
- <sup>5</sup> M. Nilsson, *Journal of Magnetic Resonance* **200**, 296 (2009).
- <sup>6</sup> H. J. Hogben, M. Krzystyniak, G. T. P. Charnock, P. J. Hore, and I. Kuprov, *Journal of Magnetic Resonance* **208**, 179 (2011).
